# Supplementary material for: Discovery and Optimization of Inhibitors for the Pup Proteasome System in Mycobacterium tuberculosis
Source: bioRxiv or medRxiv preprint supplement (doi:10.1101/796359), 2019-10-07
Supplement: Supplementary file [file media-1.pdf]

Supporting Information for

**Discovery and Optimization of Inhibitors for the Pup Proteasome System in *Mycobacterium tuberculosis***

*Guido V. Janssen,<sup>1,2</sup> Susan Zhang,<sup>4</sup> Remco Merkx,<sup>2</sup> Christa Schiesswohl,<sup>3</sup> Champak Chatterjee,<sup>3</sup> K. Heran Darwin<sup>4</sup> and Huib Ovaa<sup>1,2\*</sup>*

<sup>1</sup>Oncode Institute and Department of Cell and Chemical Biology, Leiden University Medical Center, Leiden, Eindhovenweg 20, 2333 ZC Leiden, The Netherlands.

<sup>2</sup>Division of Cell Biology, Netherlands Cancer Institute, Plesmanlaan 121, 1066 CX Amsterdam, The Netherlands.

<sup>3</sup>Department of Chemistry, University of Washington, Seattle, Washington 98195, United States.

<sup>4</sup>Department of Microbiology, New York University School of Medicine, 430 E. 29th Street, New York, New York 10016, United States.

Email: [h.ovaa@lumc.nl](mailto:h.ovaa@lumc.nl)

## **Contents**

**Supplementary figure 1** (Page S2)

**Supplementary figure 2** (Page S2)

**Supplementary figure 3** (Page S3)

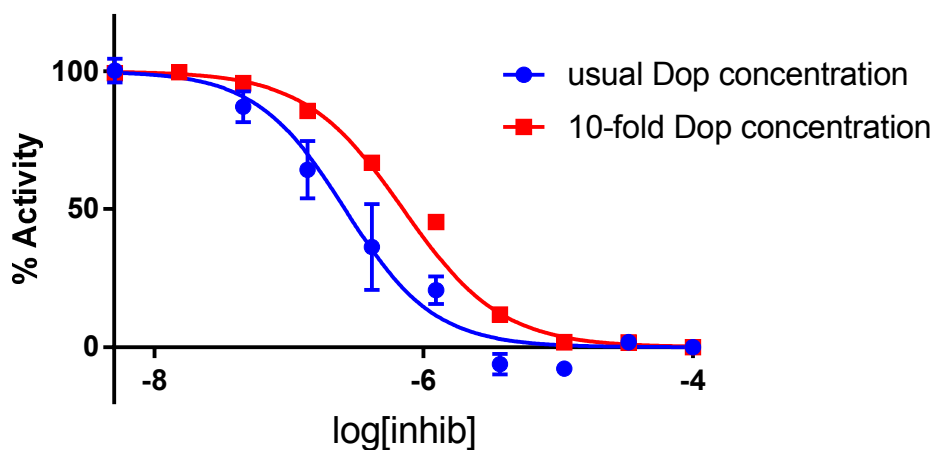

**Supplementary Figure 1.** IC<sub>50</sub> curves for the 'ratio test'. IC<sub>50</sub> value normal Dop concentration = 0.26±0.06 μM; IC<sub>50</sub> value 10-fold Dop concentration = 0.70±0.03 μM. The reported values are the means of one experiment ± SD run in triplicate. Because the deviation between the values for the 10-fold Dop concentration were very small, the error bars are not omitted.

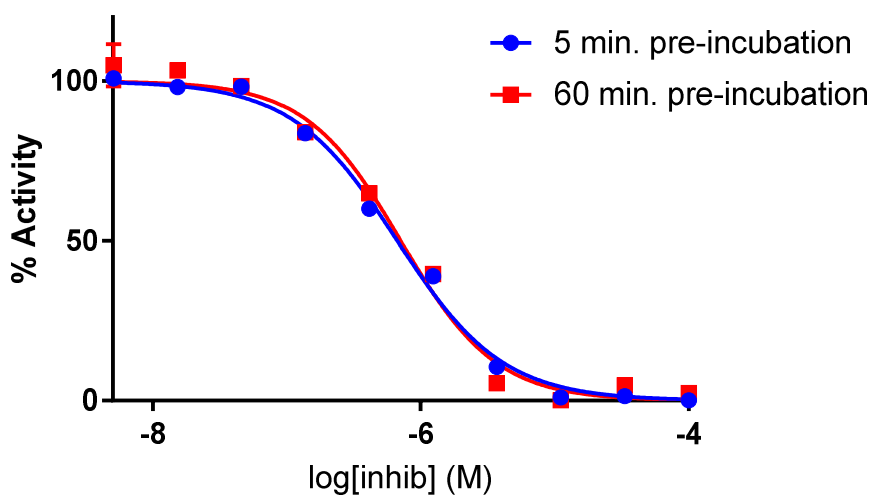

**Supplementary Figure 2.** IC<sub>50</sub> curves of compound **1** with 5 and 60 minutes inhibitor/enzyme pre-incubation. IC<sub>50</sub> value for 5 min preincubation = 0.47±0.05 μM; IC<sub>50</sub> value for 60 min preincubation = 0.71±0.08 μM. The reported values are the means of one experiment ± SD run in triplicate.

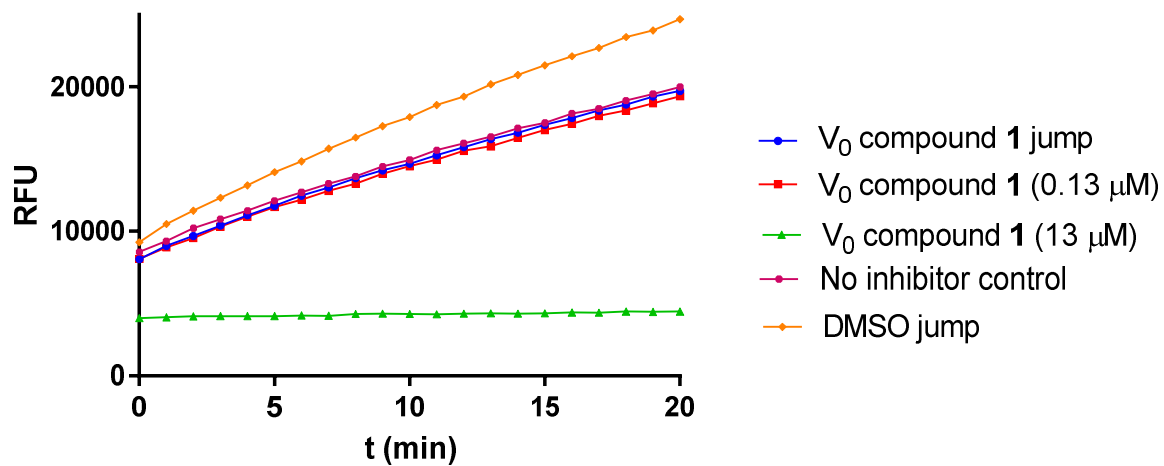

**Supplementary Figure 3.** Reaction curves for the jump dilution experiment with compound **1**. RFU = relative fluorescence units. [Dop] before jump dilution = 100 nM; [Dop] after jump dilution = 10 nM.
